# Supplementary material for: A curcumin-loaded polymeric micelle as a carrier of a microRNA-21 antisense-oligonucleotide for enhanced anti-tumor effects in a glioblastoma animal model
Source: Royal Society of Chemistry journal article supplement (doi:10.1039/c7bm01088e), 2018-01-01
Supplement: c7bm01088e1.pdf [file c7bm01088e1.pdf]

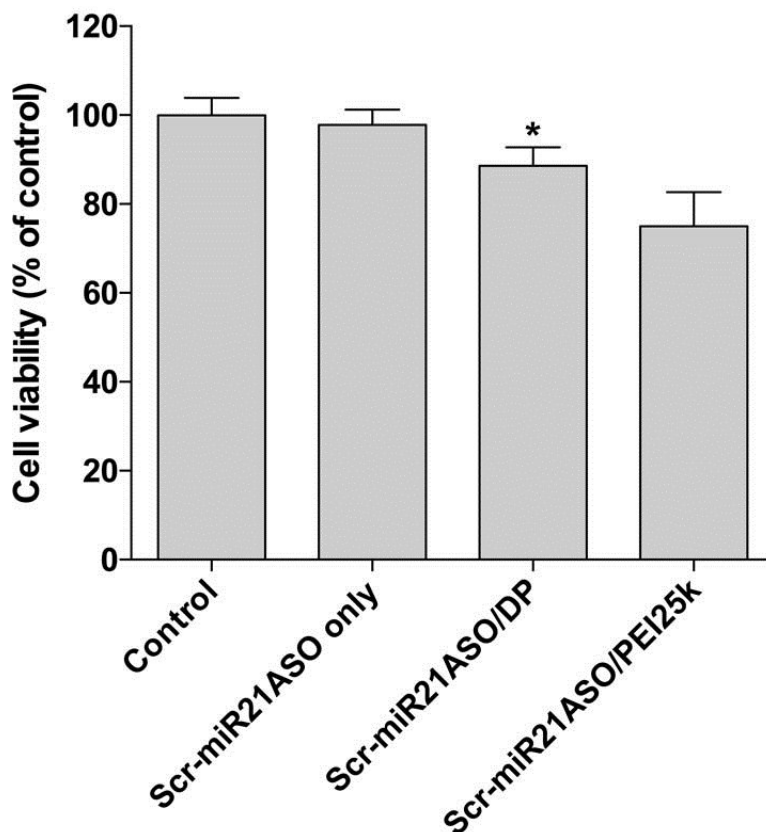

### Supplementary Figure 1. Cytotoxicity of DP and PEI25k

Cytotoxicity of DP or PEI25k was measured by MTT assay. C6 cells were seeded at  $1 \times 10^4$  cells/well in 96-well plates and incubated for 24 h at 37°C. A fixed amount of scr-miR21ASO (0.1  $\mu\text{g}$ ) was mixed with DP and PEI25k for complex formation prepared at their optimal weight ratio for the highest delivery. The complexes were added to the cells and the cells were incubated with the complexes for 24 h at 37°C in a 5%  $\text{CO}_2$  incubator. After 24 h of incubation, 20  $\mu\text{l}$  of 5 mg/ml MTT solution was added to each well, and the cells were incubated for an additional 4 h. Then, the medium including MTT solution was removed, and DMSO was added to dissolve the formazan crystals made by live cells. The absorbance at 570 nm was measured using a microplate reader (BioRad, Hercules, CA, USA). Cell viability (%) was determined by the following formula:

$$\text{Cell viability (\%)} = (\text{OD}_{570}(\text{sample}) / \text{OD}_{570}(\text{control})) \times 100$$
